# Supplementary material
Source: PubMed Central journal article supplement (PMC10482146)
Supplement: NIHMS1922115-supplement-1.pdf [file NIHMS1922115-supplement-1.pdf]

## SUPPLEMENTAL INFORMATION

Table S1. Genes targeted in Whole Exome analysis of DNA from blood or fixed tissue.

|        |         |         |         |        |
|--------|---------|---------|---------|--------|
| AQPS   | CTS6    | HTN3    | IRAK4   | S100A9 |
| ATG5   | CYBB    | IFNG    | ISYNA1  | SC5D   |
| BAK1   | CYP51A1 | IFNGR1  | ITGB2   | SFTPA1 |
| BCL10  | DCD     | IFNGR2  | JAGN1   | SFTPD  |
| BTK    | DEFA1   | IL11    | LTA     | SPON2  |
| CS     | DEFA1B  | IL12B   | LTF     | SQLE   |
| CARD9  | DEFA3   | IL12RB1 | MAIT1   | STAT1  |
| CCL7   | DEFA4   | IL12RB2 | MAPK10  | STAT3  |
| CD209  | DEFA5   | IL13    | MBL2    | SYK    |
| CHI3L1 | DEFA6   | IL17A   | MPO     | TGFB1  |
| CHIA   | DEFB4A  | IL17F   | MRPS22  | TLR2   |
| CHIT1  | ELANE   | IL17RA  | MYD88   | TIR4   |
| CLEC6A | GATA2   | IL23A   | NCF1    | TNF    |
| CLEC7A | GNLY    | IL2S    | NIPBL   | TREM1  |
| COTL1  | Gpx3    | IL36RN  | NLRP10  |        |
| CSF1   | HAMP    | 116     | NOS2    |        |
| CSF2   | HRG     | IL6R    | S100A12 |        |
| CSF3   | HTN1    | IL6ST   | S100A8  |        |
